# Supplementary material
Source: Springer Nature journal article supplement (https://www.springermedizin.de/resource/supplementary/12943_2009_522_MOESM2_ESM.pdf/9555032)

HBE-A HBE-S A549-A A549-S H460-A H460-S

p-ERK

ERK

tubulin

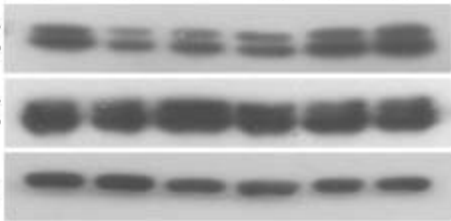

Supplement: MOESM2 [file 9555032]
